# Supplementary material
Source: Springer Nature journal article supplement (https://www.springermedizin.de/resource/supplementary/12891_2013_2014_MOESM3_ESM.pdf/9509790)

**A**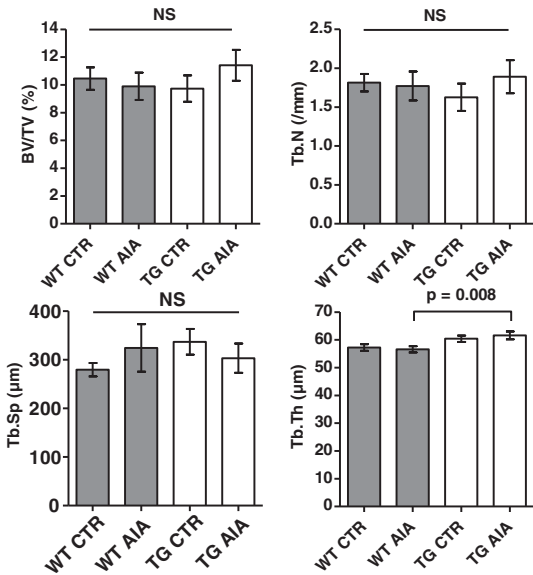**B**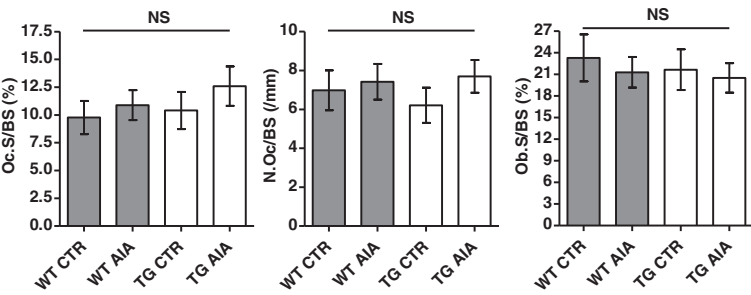

Supplement: MOESM3 [file 9509790]
